# Supplementary material for: Robust temporal pumping in a magneto-mechanical topological insulator
Source: PubMed Central journal article supplement (PMC7033202; doi:10.1038/s41467-020-14804-0), 2020-02-20
Supplement: 41467_2020_14804_MOESM2_ESM.pdf [file 41467_2020_14804_MOESM2_ESM.pdf]

## Description of Additional Supplementary Files

### Supplementary Movie 1

This animation shows a single unit cell of the magneto-mechanical array during the pumping cycle from 0 to  $2\pi$ . The two resonators in the unit cell are marked as Site A and Site B. Angular rotation of the modulation shaft induces on-site potential modulation (OPM) via permanent magnets (shown as blue and red disks), as well as coupling modulation through the off-axis high-permeability metal alloy sheet (shown in green).
